# Supplementary material
Source: PubMed Central journal article supplement (PMC3642864)

# Supplemental 1

A

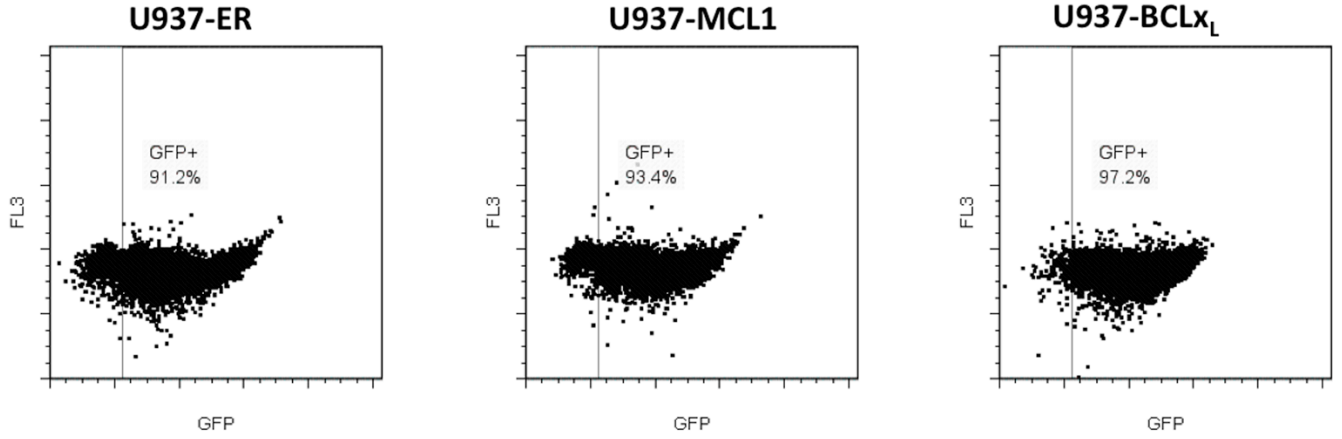

B

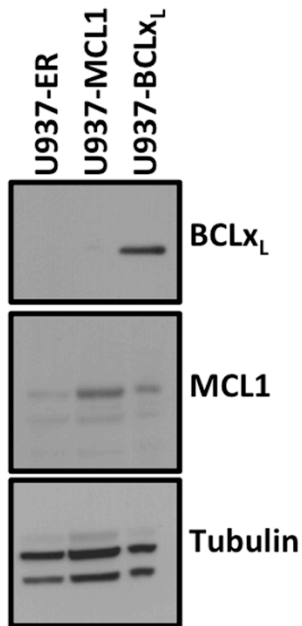

C

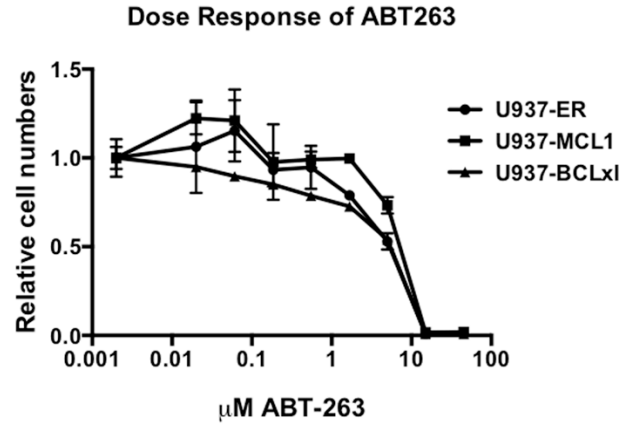

Supplement: NIHMS453844-supplement-supplement_1.pdf [file NIHMS453844-supplement-supplement_1.pdf]

Supplemental 2

A

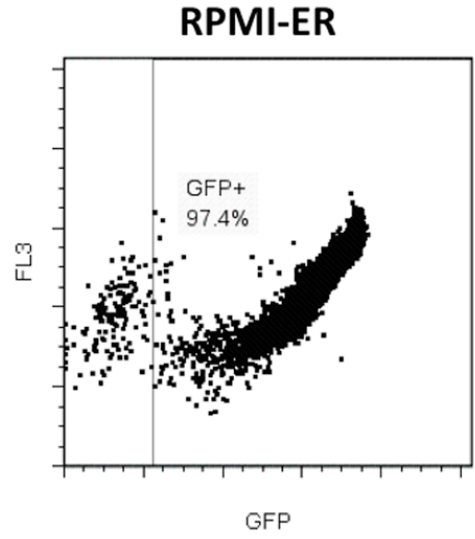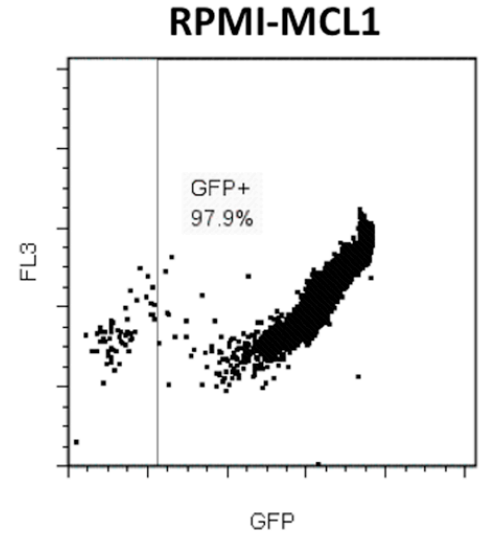

B

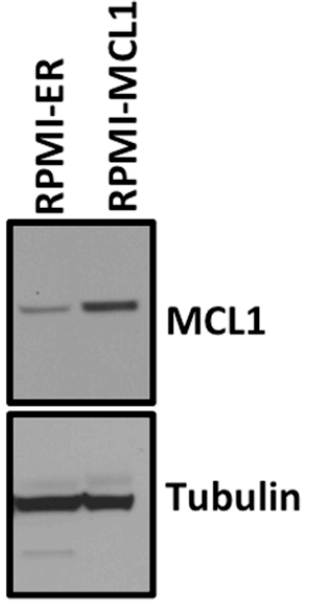

C

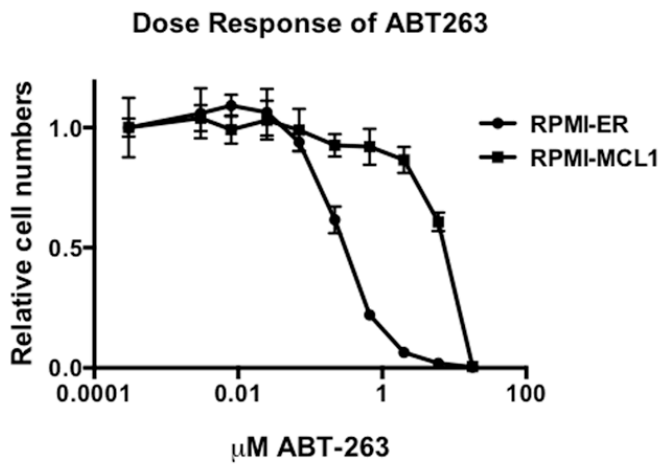

Supplement: NIHMS453844-supplement-supplement_2.pdf [file NIHMS453844-supplement-supplement_2.pdf]
